# Supplementary material for: SARS-CoV-2 Neutralizing Antibodies to B.1 and to BA.5 Variant after Booster Dose of BNT162b2 Vaccine in HIV Patients COVID-Naïve and on Successful Antiretroviral Therapy
Source: MDPI journal article supplement (doi:10.3390/vaccines11040871), 2023-04-20
Supplement: s1 [file s1]

**Table S1.** Neutralizing antibody titers to B.1 and to BA.5 classified as outliers (n=19). Data are expressed as ID<sub>50</sub>: reciprocal value of the sample dilution that showed a 50% protection from the virus-induced cytopathic effect.

|                                                            | N (%)    | Median ID <sub>50</sub> (IQR) |
|------------------------------------------------------------|----------|-------------------------------|
| Outliers only to B.1                                       | 2 (10.5) | 3139 (2541-3738)              |
| Outliers only to BA.5                                      | 5 (26.3) | 495 (445-1196)                |
| Outliers to B.1 in patients with outliers to both strains  | 6 (31.6) | 3723 (2730-4638)              |
| Outliers to BA.5 in patients with outliers to both strains | 6 (31.6) | 901 (861-1024)                |
