# Supplementary material for: SARS-CoV-2 Neutralizing Antibodies to B.1 and to BA.5 Variant after Booster Dose of BNT162b2 Vaccine in HIV Patients COVID-Naïve and on Successful Antiretroviral Therapy
Source: MDPI journal article supplement (doi:10.3390/vaccines11040871), 2023-04-20
Supplement: s1 [file s1]

**Table S2.** Raw data and comparison after outliers (n=13) removal.

| Test\parameter                     | Raw data (n=100)   | Sensitivity analysis (n=87) |
|------------------------------------|--------------------|-----------------------------|
| <b>Correlation analysis</b>        |                    |                             |
| <b>Pearson's r</b>                 | 0.56               | 0.69                        |
| <b>p-value</b>                     | < 0.001            | < 0.001                     |
| <b>* R<sup>2</sup></b>             | 0.31               | 0.48                        |
| <b>* (df model; df residual) F</b> | (1;98) 44.48       | (1;85) 77.79                |
| <b>* p-value</b>                   | < 0.0001           | < 0.0001                    |
| <b>* Coeff.</b>                    | 0.18 (0.13 – 0.23) | 0.12 (0.09 – 0.14)          |

\*: Parameters relative to univariate linear regression model; df: degrees of freedom
